# Supplementary material for: Synthesis, Crystallographic, Quantum Chemical, Antitumor, and Molecular Docking/Dynamic Studies of 4-Hydroxycoumarin-Neurotransmitter Derivatives
Source: MDPI journal article supplement (doi:10.3390/ijms23021001), 2022-01-17
Supplement: s1 [file s1]

Supplementary Information for:

# Synthesis, Crystallographic, Quantum Chemical, Antitumor, and Molecular Docking/Dynamic Studies of 4-Hydroxycoumarin-Neurotransmitter Derivatives

Dušan S. Dimić <sup>1,\*</sup>, Goran N. Kaluđerović <sup>2</sup>, Edina H. Avdović <sup>3</sup>, Dejan A. Milenković <sup>3</sup>, Marko N. Živanović <sup>3</sup>,  
Ivan Potočňák <sup>4</sup>, Erika Samoľová <sup>5</sup>, Milena S. Dimitrijević <sup>6</sup>, Luciano Saso <sup>7</sup>, Zoran S. Marković <sup>3</sup> and  
Jasmina M. Dimitrić Marković <sup>1</sup>

<sup>1</sup> Faculty of Physical Chemistry, University of Belgrade, Studentski trg 12-16, 11000 Belgrade, Serbia;  
markovich@ffh.bg.ac.rs

<sup>2</sup> Department of Engineering and Natural Sciences, University of Applied Sciences Merseburg, Eberhard-Leibnitz-  
Straße 2, DE-06217 Merseburg, Germany; goran.kaluderovic@hs-merseburg.de

<sup>3</sup> Department of Science, Institute for Information Technologies, University of Kragujevac, Jovana Cvijića bb,  
34000 Kragujevac, Serbia; edina.avdovic@pmf.kg.ac.rs (E.H.A.); deki82@kg.ac.rs (D.A.M.);  
marko.zivanovic@uni.kg.ac.rs (M.N.Ž.); zmarkovic@uni.kg.ac.rs (Z.S.M.)

<sup>4</sup> Institute of Chemistry, P. J. Šafárik University in Košice, Moyzesova 11, 04154 Košice, Slovakia;  
ivan.potocnak@upjs.sk

<sup>5</sup> Institute of Physics of the Czech Academy of Sciences, Na Slovance 2, 182 21 Prague 8, Czech Republic;  
samolova@fzu.cz

<sup>6</sup> Department of Life Sciences, Institute for Multidisciplinary Research, University of Belgrade, Kneza Višeslava 1,  
11030 Belgrade, Serbia; milena.dimitrijevic@imsi.bg.ac.rs

<sup>7</sup> Department of Physiology and Pharmacology "Vittorio Erspamer", Sapienza University of Rome, P.le Aldo Moro  
5, 00185 Rome, Italy; luciano.saso@uniroma1.it

\* Correspondence: ddimic@ffh.bg.ac.rs

## 1. Fukui functions

Fukui functions are very useful parameters when it comes to the investigation of the possible electrophilic, nucleophilic, and radical attack sites. These parameters can also be used for the prediction of the binding sites for interactions with various amino acids in proteins. Fukui functions describe the change in total electron density when anions and cations are formed. Their evaluation depends on the chosen methodology, and several ways for their calculation are found in the literature [64,77]. Condensed Fukui functions (CFF) can be determined for the specific atoms in the following way:

$$f_A^+ = q_N^A - q_{N+1}^A \quad (S1)$$

$$f_A^- = q_{N-1}^A - q_N^A \quad (S2)$$

$$f_A^0 = [q_{N-1}^A - q_{N+1}^A]/2 \quad (S3)$$

To obtain CFFs, the charges on atom A have to be determined in the neutral, anionic, and cationic species. When CFF values are compared, a higher value represents a more reactive site [65]. The CFFs were calculated in the Multiwfn program package [66].

## 2. Molecular Docking—Binding free energy

The AutoDock program calculates the free energy of binding values according to the following equation, Equation (S4):

$$\Delta G_{\text{bind}} = \Delta G_{\text{vdw+hbond+desolv}} + \Delta G_{\text{elec}} + \Delta G_{\text{total}} + \Delta G_{\text{tor}} - \Delta G_{\text{unb}} \quad (S4)$$

where  $\Delta G_{\text{bind}}$  is the estimated free energy of binding, and  $\Delta G_{\text{vdw+hbond+desolv}}$  denotes the sum of the energies of dispersion and repulsion ( $\Delta G_{\text{vdw}}$ ), hydrogen bond ( $\Delta G_{\text{hbond}}$ ), and desolvation ( $\Delta G_{\text{desolv}}$ ).  $\Delta G_{\text{total}}$  represents the final total internal energy,  $\Delta G_{\text{tor}}$  is torsional free energy,  $\Delta G_{\text{unb}}$  is unbound system's energy, and  $\Delta G_{\text{elec}}$  is electrostatic energy.

## 3. Molecular Dynamics—Binding free energy

The free energy of the binding of the investigated complex was determined by the following equation (Equation (S5)).

$$\Delta G_{\text{bind}} = \Delta G_{\text{complex}} - (\Delta G_{\text{protein}} + \Delta G_{\text{ligand}}) \quad (S5)$$

where  $\Delta G_{\text{bind}}$  is the binding free energy of hCA-IX with investigated compounds,  $\Delta G_{\text{complex}}$  is the total free energy hCA-IX with investigated compounds, and  $\Delta G_{\text{protein}}$  and  $\Delta G_{\text{ligand}}$  are total free energies of hCA-IX and investigated ligands in a solvent, respectively. The free energy of the individual molecules was estimated according to Equation (S6):

$$\Delta G_{\text{molecule}} = \Delta E_{\text{MM}} - TS + \Delta G_{\text{solvation}} \quad (S6)$$

where  $\Delta G_{\text{molecule}}$  is the free energy of protein, ligand, or protein-ligand complex, and  $E_{\text{MM}}$  is the average molecular mechanics (MM) potential energy in the vacuum. TS denotes the entropic contribution to the free energy, while T and S represent the temperature and entropy, respectively. On the other hand,  $\Delta G_{\text{solvation}}$  represents the free energy solvation to transfer a solute from a vacuum to a solvent.  $\Delta E_{\text{MM}}$  (Equation (S7)) is expressed as follows:

$$\Delta E_{\text{MM}} = \Delta E_{\text{bonded}} + \Delta E_{\text{nonbonded}} = \Delta E_{\text{bonded}} + \Delta E_{\text{vdw}} + \Delta E_{\text{elec}} \quad (S7)$$

$\Delta E_{\text{bonded}}$  is the bonded interactions that contribute to the bond, angle, dihedral, and improper interactions, while  $\Delta E_{\text{nonbonded}}$  denotes nonbonded interaction involving the van der Waals electrostatic

energy terms.  $\Delta E_{\text{bonded}}$  is always taken as zero.  $\Delta G_{\text{solvation}}$  is an energy term calculated in an implicit solvent as shown in Equation (S8):

$$\Delta G_{\text{solvation}} = \Delta G_{\text{polar}} + \Delta G_{\text{nonpolar}} \quad (\text{S8})$$

$\Delta G_{\text{polar}}$  refers to the solvation free energy of the electrostatic interactions calculated by solving the Poisson–Boltzmann (PB) equation, and  $\Delta G_{\text{nonpolar}}$  represents non-electrostatic interactions to the solvation free energy, which refers to the solvent-accessible surface area (SASA) model. The obtained results of the average binding energy ( $\text{kJ mol}^{-1}$ ) calculations can offer better insight into the interactions of the above-mentioned complexes.

Table S1: HPLC data for compound 4-hydroxycoumarin.

|                                                   | Retention time<br>(min) | Area           | Peak height   | %            |
|---------------------------------------------------|-------------------------|----------------|---------------|--------------|
| 1                                                 | 3.30                    | 8926           | 1074          | 0.21         |
| 2                                                 | <b>9.36</b>             | <b>4132824</b> | <b>914754</b> | <b>98.26</b> |
| 3                                                 | 11.22                   | 3793           | 316           | 0.09         |
| 4                                                 | 13.75                   | 494            | 121           | 0.01         |
| 5                                                 | 14.99                   | 2289           | 511           | 0.05         |
| 6                                                 | 16.65                   | 53207          | 18729         | 1.27         |
| 7                                                 | 17.77                   | 4542           | 307           | 0.11         |
| Wavelength: 280 nm; Duration 20 min; Volume: 20µL |                         |                |               |              |

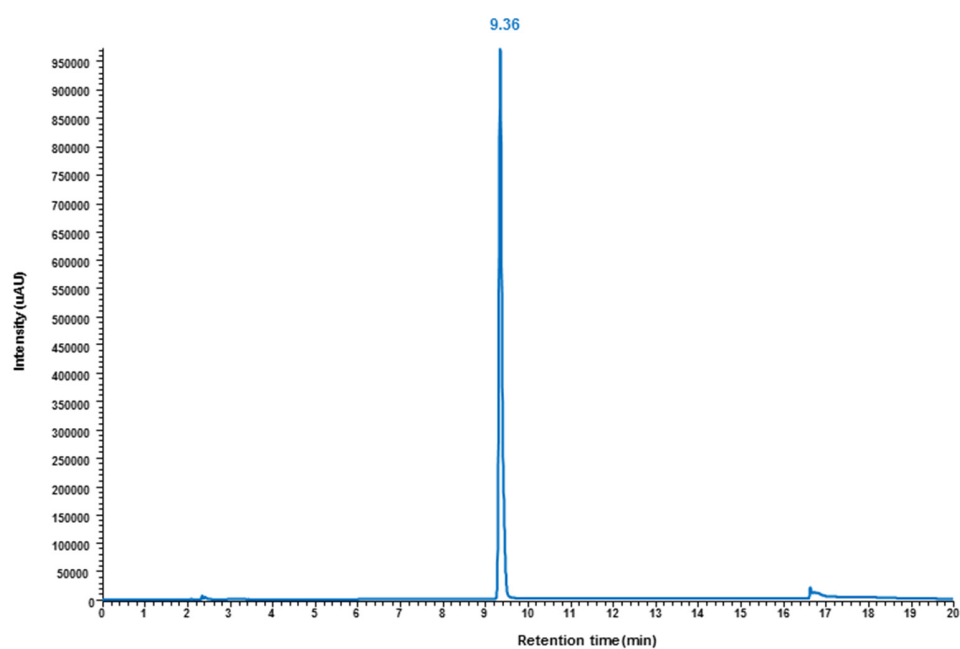

Figure S1: HPLC chromatogram of 4-hydroxycoumarin.

Table S2: HPLC data for compound **3-acetyl-4-hydroxycoumarin**.

|                                                   | Retention time<br>(min) | Area           | Peak height   | %            |
|---------------------------------------------------|-------------------------|----------------|---------------|--------------|
| 1                                                 | 3.45                    | 5691           | 977           | 0.24         |
| 2                                                 | 9.36                    | 3748           | 873           | 0.21         |
| 3                                                 | 11.48                   | 587            | 174           | 0.04         |
| <b>4</b>                                          | <b>12.33</b>            | <b>2501926</b> | <b>386780</b> | <b>94.58</b> |
| 5                                                 | 13.44                   | 800            | 187           | 0.05         |
| 6                                                 | 15.02                   | 19635          | 1651          | 0.40         |
| 7                                                 | 16.65                   | 53699          | 18996         | 4.65         |
| 8                                                 | 17.77                   | 3978           | 290           | 0.07         |
| Wavelength: 280 nm; Duration 20 min; Volume: 20µL |                         |                |               |              |

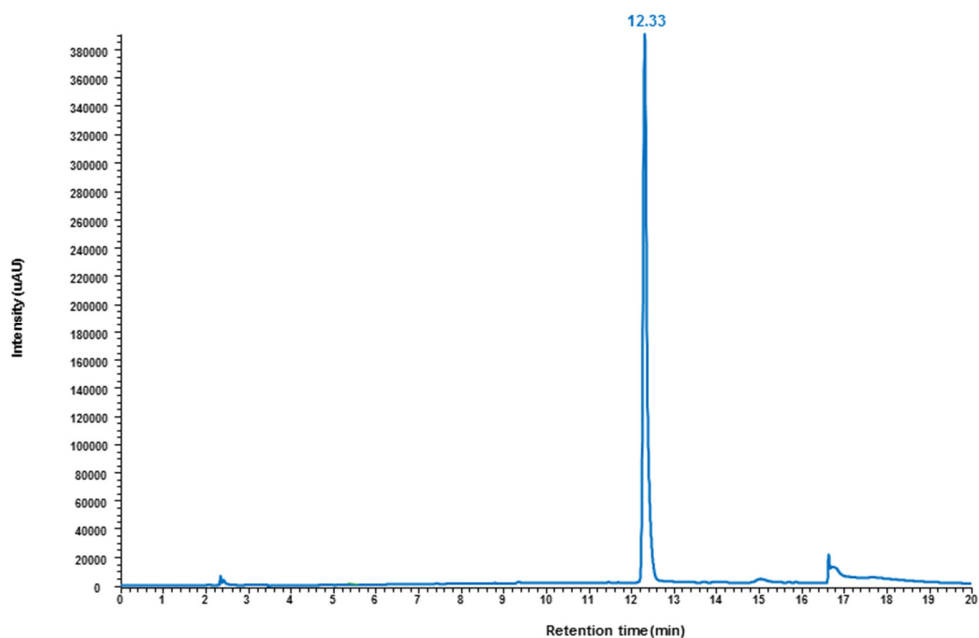

Figure S2: HPLC chromatogram of compound **3-acetyl-4-hydroxycoumarin**.

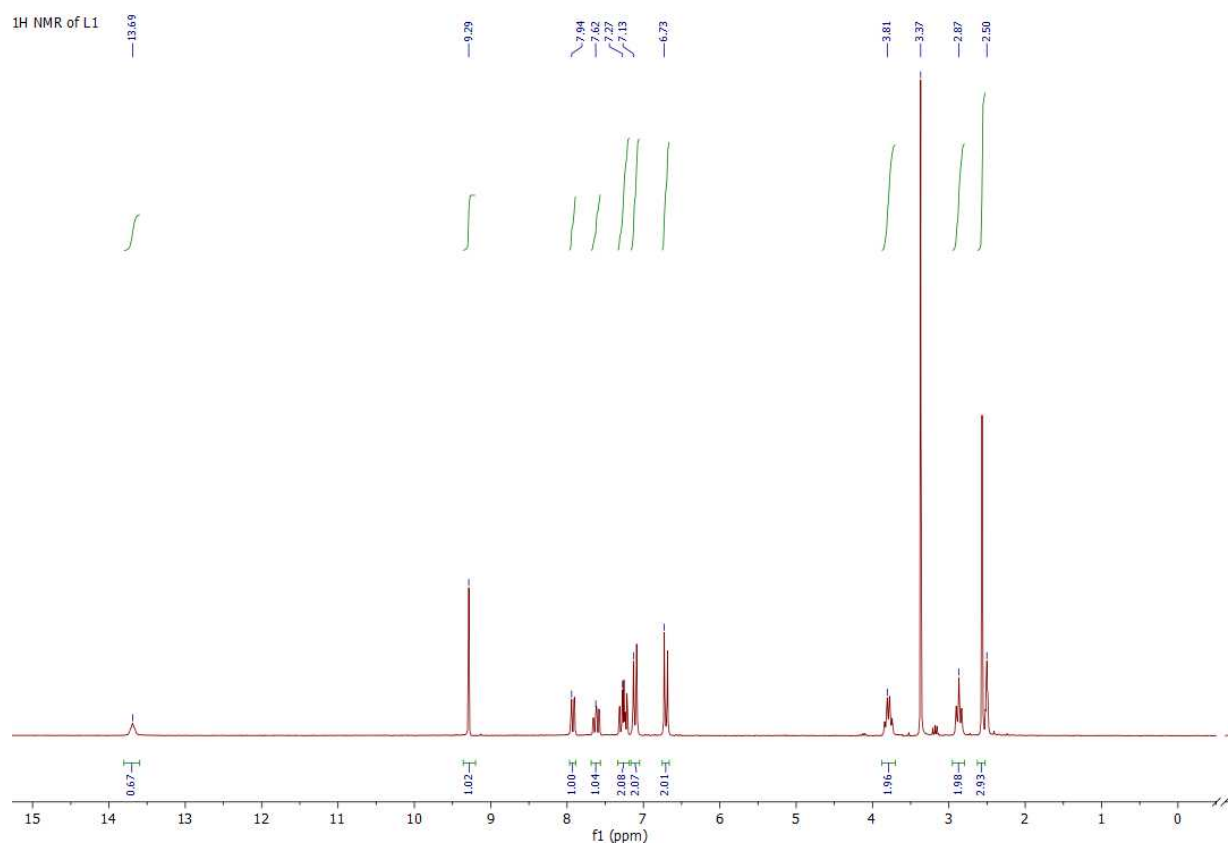

Figure S3. The <sup>1</sup>H spectrum of L1.

$^{13}\text{C}$  NMR of L1

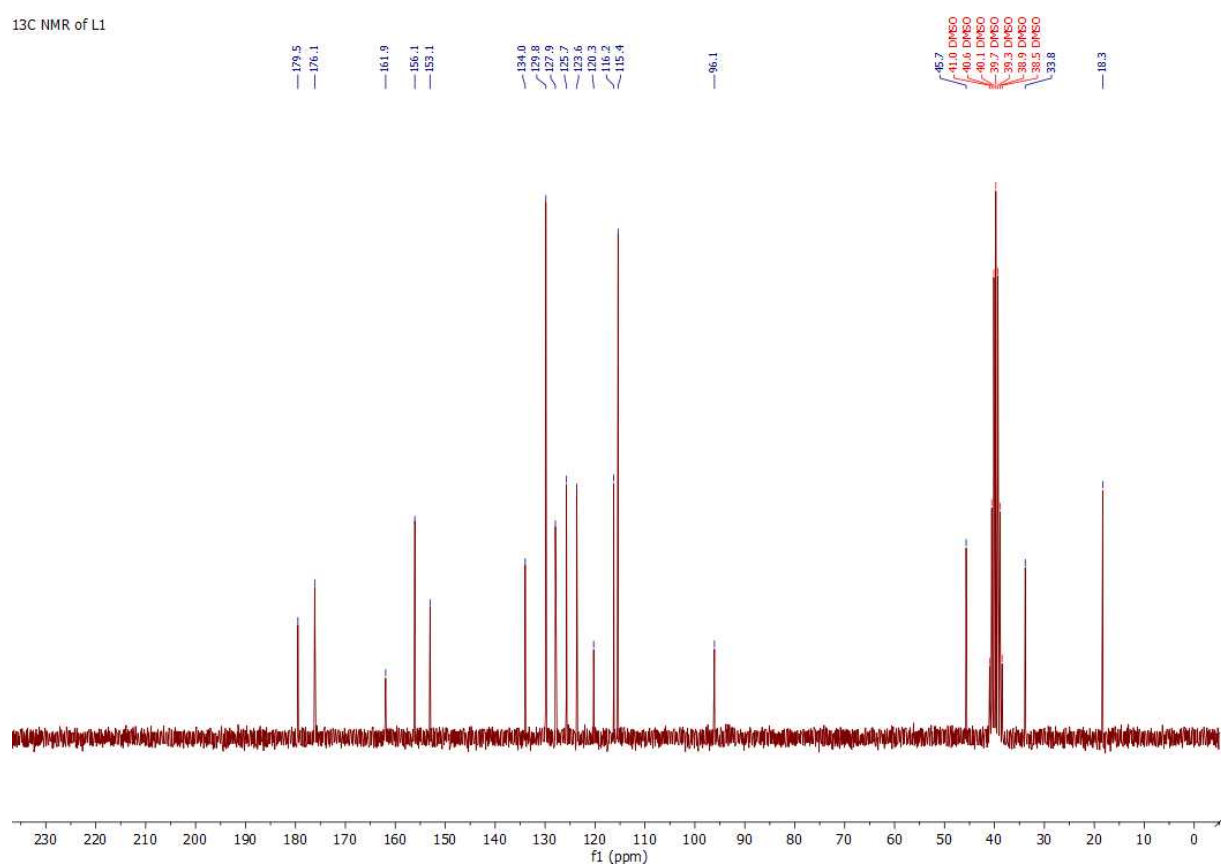

Figure S4. The  $^{13}\text{C}$  spectrum of L1.

Table S3: HPLC data for compound **L1**.

|                                                   | Retention time<br>(min) | Area           | Peak height   | %            |
|---------------------------------------------------|-------------------------|----------------|---------------|--------------|
| 1                                                 | 3.44                    | 6264           | 1139          | 0.25         |
| 2                                                 | <b>11.39</b>            | <b>2452787</b> | <b>471063</b> | <b>99.34</b> |
| 3                                                 | 12.32                   | 8384           | 54357         | 0.34         |
| 4                                                 | 16.65                   | 1569           | 19055         | 0.06         |
| Wavelength: 280 nm; Duration 20 min; Volume: 20µL |                         |                |               |              |

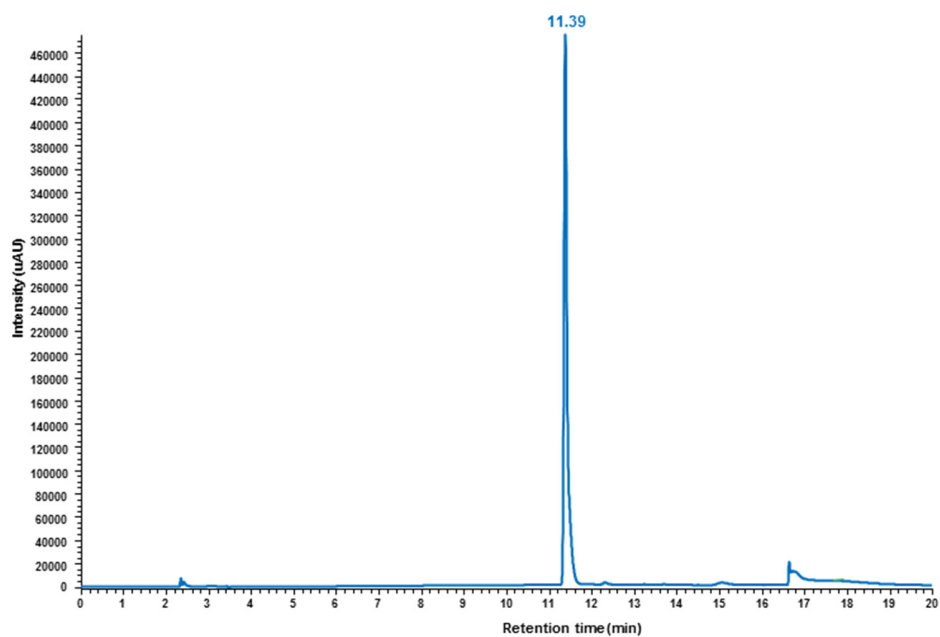

Figure S5: HPLC chromatogram of compound **L1**.



<sup>1</sup>H NMR of L2

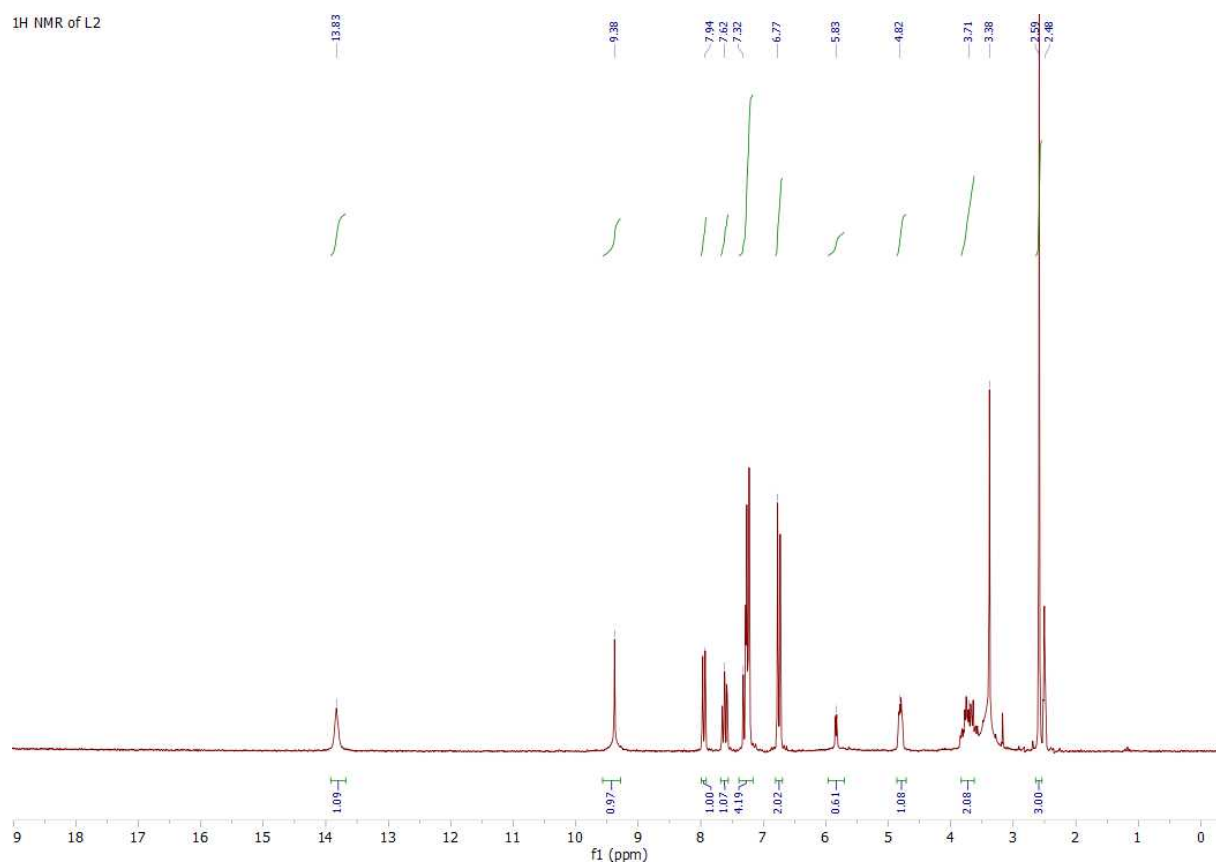

Figure S6. The <sup>1</sup>H spectrum of L2.

$^{13}\text{C}$  NMR of L2

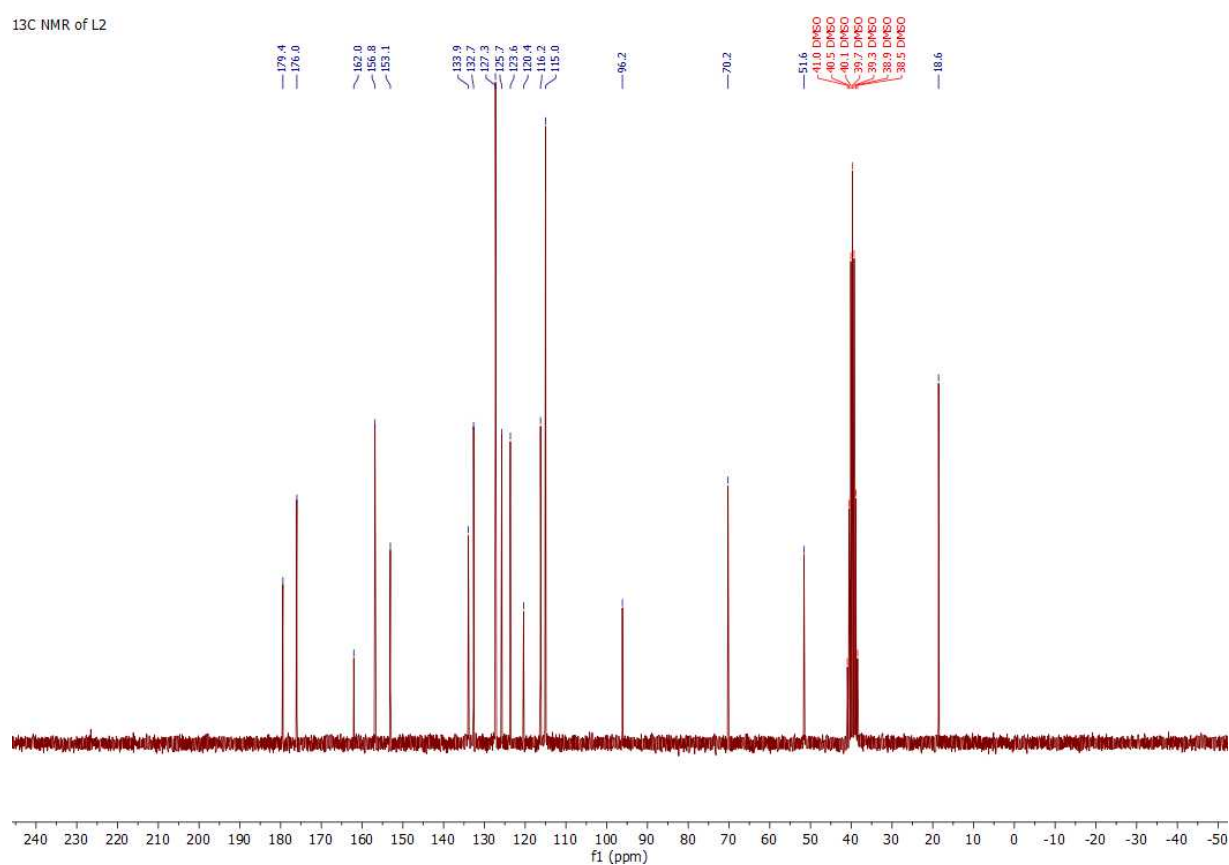

Figure S7. The  $^{13}\text{C}$  spectrum of L2.

Table S4: HPLC data for compound **L2**.

|                                                         | Retention time<br>(min) | Area           | Peak height   | %            |
|---------------------------------------------------------|-------------------------|----------------|---------------|--------------|
| 1                                                       | 3.44                    | 5550           | 998           | 0.20         |
| 2                                                       | 9.56                    | 1210           | 316           | 0.04         |
| <b>3</b>                                                | <b>10.03</b>            | <b>2744256</b> | <b>528444</b> | <b>97.70</b> |
| 4                                                       | 12.33                   | 3986           | 654           | 0.14         |
| 5                                                       | 16.65                   | 53979          | 19005         | 1.92         |
| Wavelength: 280 nm; Duration 20 min; Volume: 20 $\mu$ L |                         |                |               |              |

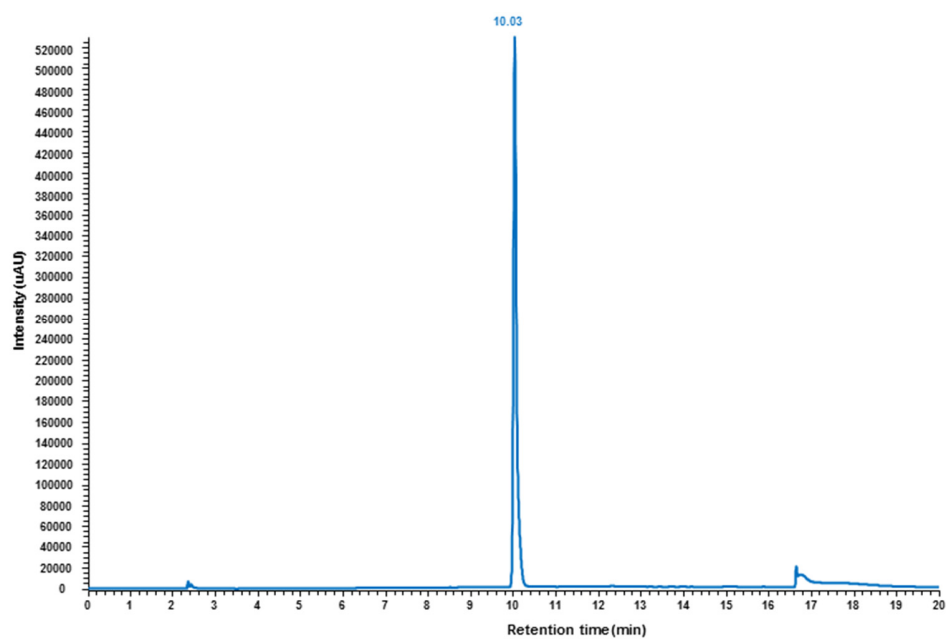

Figure S8: HPLC chromatogram of compound **L2**.

<sup>1</sup>H NMR of L3

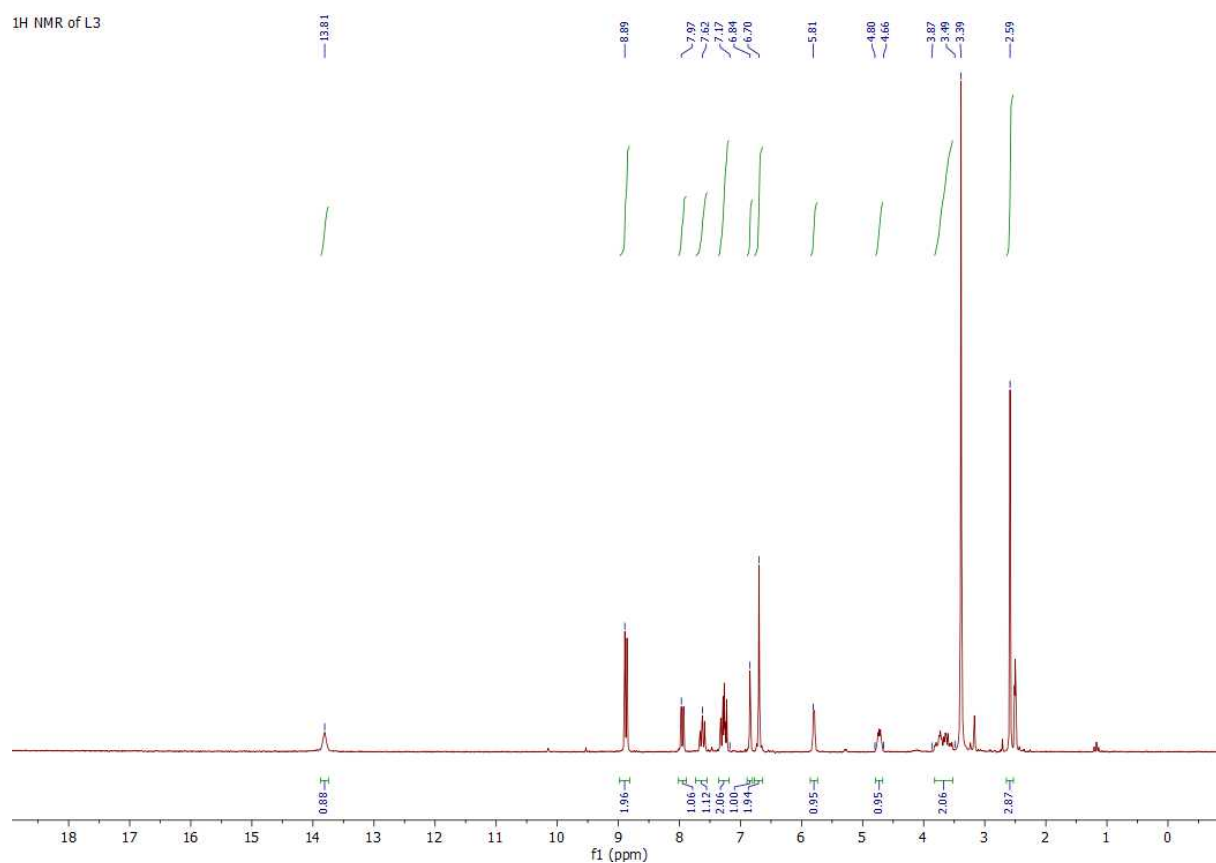

Figure S9. The <sup>1</sup>H spectrum of L3.

$^{13}\text{C}$  NMR of L3

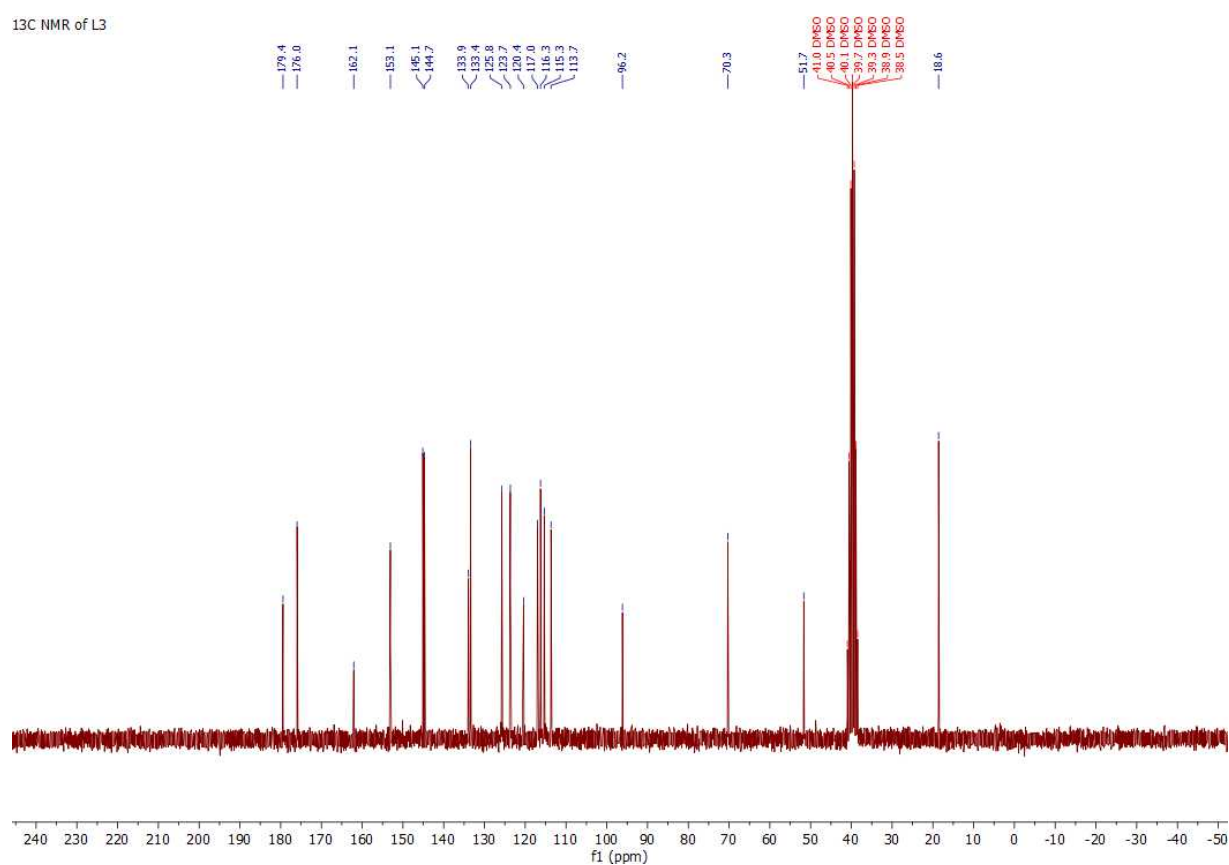

Figure S10. The  $^{13}\text{C}$  spectrum of L3.

Table S5: HPLC data for compound **L3**.

|                                                         | Retention time (min) | Area           | Peak height   | %            |
|---------------------------------------------------------|----------------------|----------------|---------------|--------------|
| 1                                                       | 3.44                 | 5278           | 1027          | 0.13         |
| 2                                                       | 6.62                 | 1598           | 385           | 0.04         |
| 3                                                       | 10.11                | 52872          | 13096         | 1.28         |
| <b>4</b>                                                | <b>11.55</b>         | <b>3965357</b> | <b>959713</b> | <b>96.25</b> |
| 5                                                       | 12.24                | 41573          | 8727          | 1.01         |
| 6                                                       | 16.65                | 48500          | 18246         | 1.18         |
| 7                                                       | 17.71                | 4684           | 293           | 0.11         |
| Wavelength: 280 nm; Duration 20 min; Volume: 20 $\mu$ L |                      |                |               |              |

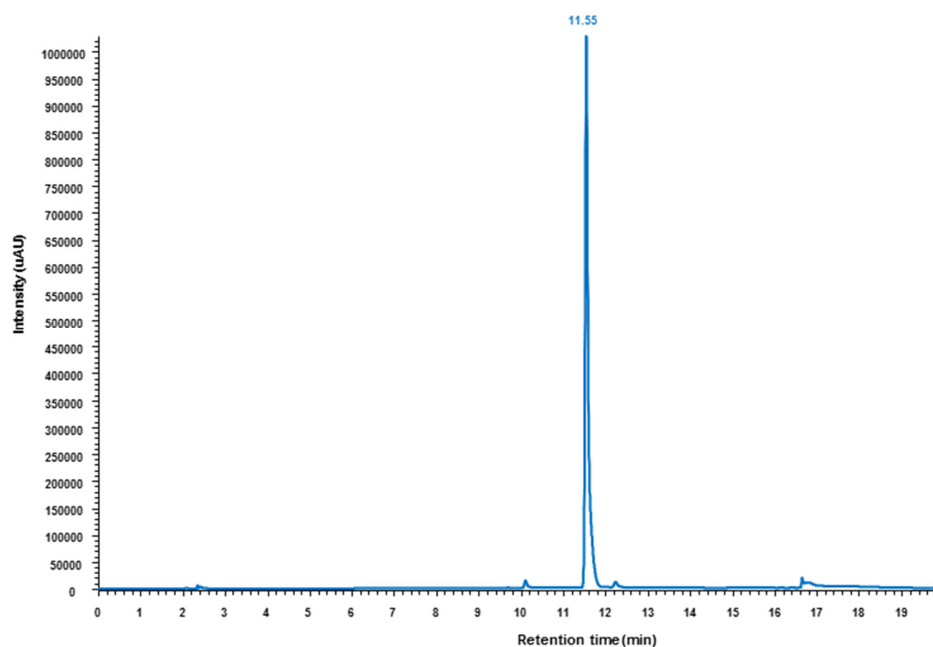

Figure S11: HPLC chromatogram of compound **L3**.

$^1\text{H}$  NMR of L4

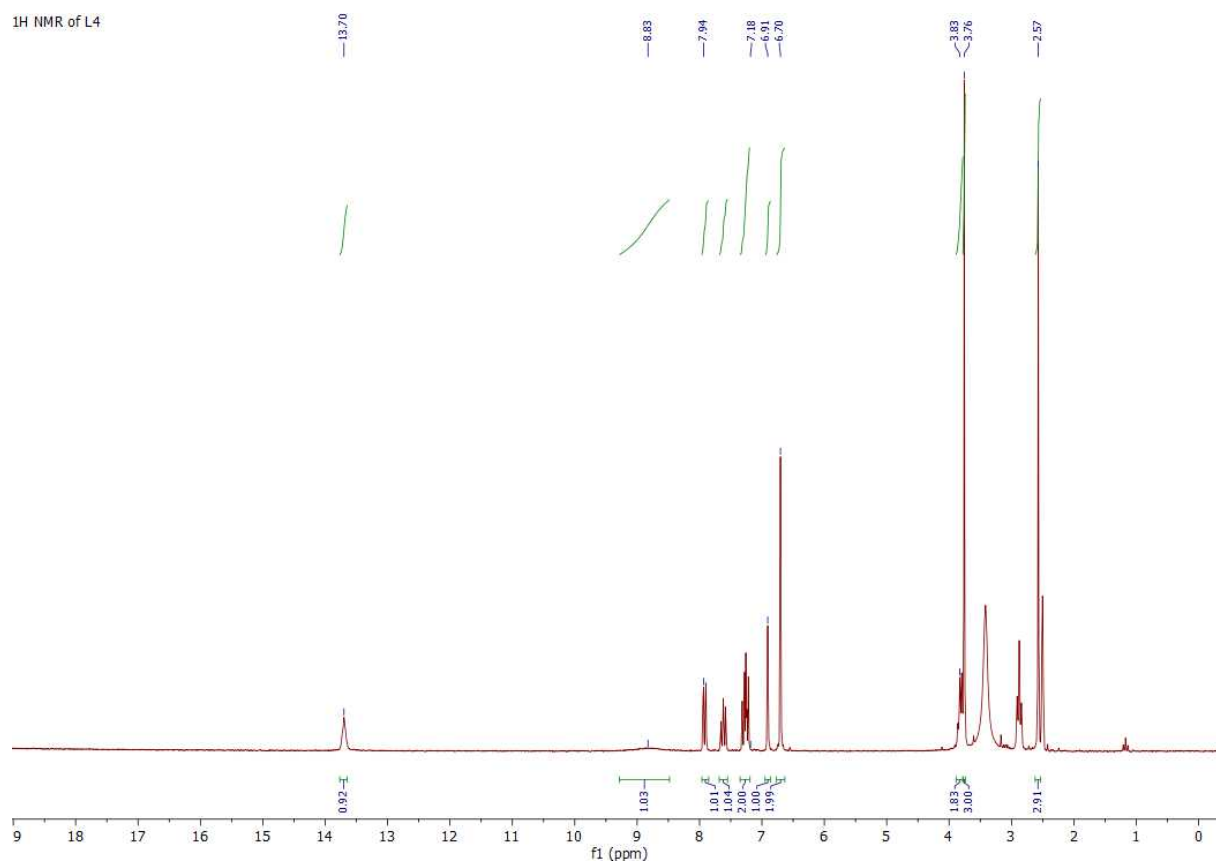

Figure S12. The  $^1\text{H}$  spectrum of **L4**.

$^{13}\text{C}$  NMR of L4

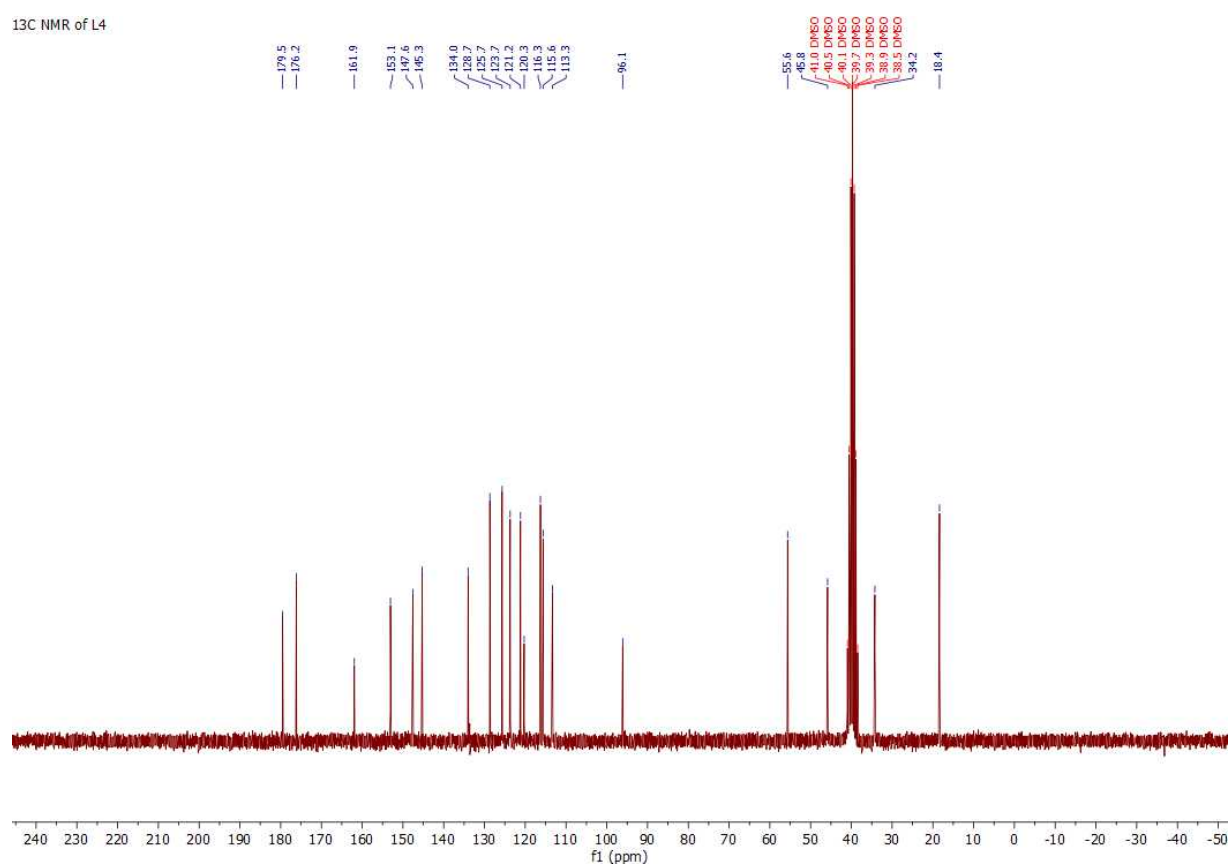

Figure S13. The  $^{13}\text{C}$  spectrum of L4.



Table S6: HPLC data for compound **L4**.

|                                                         | Retention time (min) | Area           | Peak height   | %            |
|---------------------------------------------------------|----------------------|----------------|---------------|--------------|
| 1                                                       | 3.44                 | 6174           | 1035          | 0.21         |
| 2                                                       | 7.77                 | 365            | 113           | 0.01         |
| 3                                                       | 9.93                 | 17585          | 4309          | 0.59         |
| <b>4</b>                                                | <b>11.38</b>         | <b>2734788</b> | <b>497100</b> | <b>91.84</b> |
| 5                                                       | 12.24                | 168786         | 38723         | 5.67         |
| 6                                                       | 16.65                | 45619          | 17835         | 1.53         |
| 7                                                       | 17.75                | 4560           | 288           | 0.15         |
| Wavelength: 280 nm; Duration 20 min; Volume: 20 $\mu$ L |                      |                |               |              |

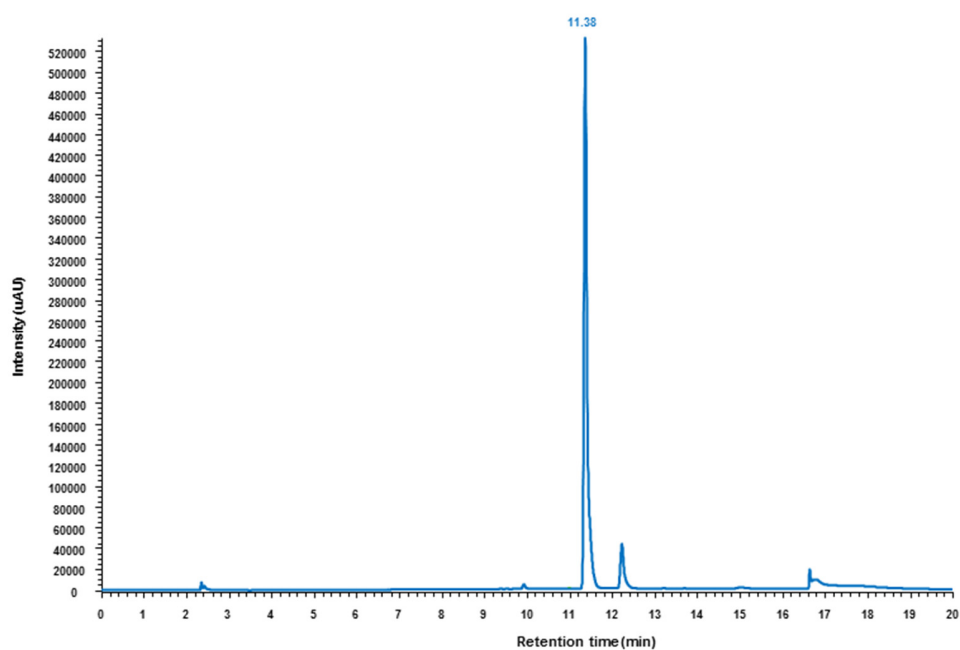

Figure S14: HPLC chromatogram of compound **L4**.

Table S7: HPLC data for compound **L5**.

|                                                   | Retention time<br>(min) | Area           | Peak height   | %            |
|---------------------------------------------------|-------------------------|----------------|---------------|--------------|
| 1                                                 | 3.44                    | 6623           | 1084          | 0.23         |
| <b>2</b>                                          | <b>10.59</b>            | <b>2807145</b> | <b>546626</b> | <b>97.37</b> |
| 3                                                 | 12.32                   | 8877           | 1683          | 0.31         |
| 4                                                 | 13.71                   | 3868           | 805           | 0.13         |
| 5                                                 | 16.65                   | 51775          | 18657         | 1.80         |
| 6                                                 | 17.79                   | 4544           | 310           | 0.16         |
| Wavelength: 280 nm; Duration 20 min; Volume: 20µL |                         |                |               |              |

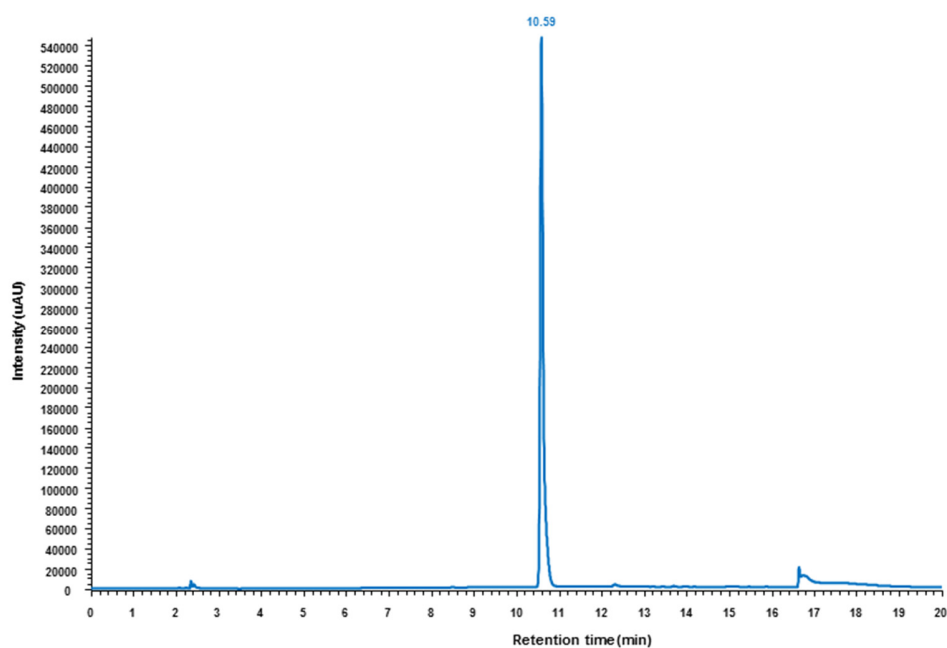

Figure S15: HPLC chromatogram of compound **L5**.

Table S8. Bond lengths in crystallographic and optimized structures (given functionals in conjunction with 6-311++G(d,p) basis set) of **L2** [Å].

|           |           | APFD  | B3LZP-D3 | M05-2X | M06-2X |
|-----------|-----------|-------|----------|--------|--------|
| O1-C2     | 1.375 (2) | 1.388 | 1.393    | 1.381  | 1.380  |
| C2-O2     | 1.223 (2) | 1.208 | 1.210    | 1.204  | 1.204  |
| C2-C3     | 1.439 (2) | 1.455 | 1.457    | 1.455  | 1.459  |
| C3-C4     | 1.441 (2) | 1.447 | 1.451    | 1.446  | 1.449  |
| C4-O3     | 1.254 (2) | 1.245 | 1.248    | 1.239  | 1.237  |
| C4-C10    | 1.472 (2) | 1.466 | 1.471    | 1.472  | 1.476  |
| C10-C5    | 1.403 (2) | 1.398 | 1.402    | 1.397  | 1.398  |
| C10-C9    | 1.385 (2) | 1.393 | 1.394    | 1.386  | 1.389  |
| C5-C6     | 1.381 (2) | 1.383 | 1.385    | 1.381  | 1.383  |
| C6-C7     | 1.395 (2) | 1.400 | 1.401    | 1.398  | 1.399  |
| C7-C8     | 1.380 (2) | 1.385 | 1.387    | 1.383  | 1.384  |
| C8-C9     | 1.389 (2) | 1.394 | 1.395    | 1.392  | 1.394  |
| C9-O1     | 1.375(2)  | 1.356 | 1.363    | 1.360  | 1.359  |
| C3-C1'    | 1.441 (2) | 1.424 | 1.426    | 1.421  | 1.421  |
| C1'-C2'   | 1.495 (2) | 1.496 | 1.501    | 1.499  | 1.501  |
| C1'-N1    | 1.305 (2) | 1.321 | 1.326    | 1.319  | 1.323  |
| N1-C1''   | 1.467 (2) | 1.447 | 1.456    | 1.455  | 1.454  |
| C1''-C2'' | 1.457 (3) | 1.523 | 1.527    | 1.521  | 1.524  |
| C2''-C3'' | 1.517 (3) | 1.510 | 1.513    | 1.510  | 1.512  |
| C3''-C4'' | 1.375 (2) | 1.393 | 1.396    | 1.391  | 1.393  |
| C4''-C5'' | 1.392 (2) | 1.389 | 1.391    | 1.388  | 1.389  |
| C5''-C6'' | 1.372 (2) | 1.396 | 1.396    | 1.392  | 1.393  |
| C6''-O5   | 1.365 (2) | 1.359 | 1.366    | 1.361  | 1.360  |
| C6''-C7'' | 1.385 (2) | 1.394 | 1.395    | 1.390  | 1.393  |
| C7''-C8'' | 1.377 (2) | 1.387 | 1.390    | 1.386  | 1.387  |
| C8''-C3'' | 1.369 (2) | 1.395 | 1.397    | 1.393  | 1.395  |

Table S9. Bond angles in crystallographic and optimized structures (given functionals in conjunction with 6-311++G(d,p) basis set) of **L2** [°].

|           |       | APFD  | B3LZP-D3 | M05-2X | M06-2X |
|-----------|-------|-------|----------|--------|--------|
| O1-C2-O2  | 113.0 | 115.2 | 115.0    | 115.4  | 115.3  |
| O1-C2-C3  | 119.1 | 117.8 | 117.7    | 117.7  | 117.8  |
| O2-C2-C3  | 127.8 | 127.0 | 127.3    | 126.9  | 126.8  |
| C2-C3-C1' | 119.2 | 119.1 | 119.0    | 118.8  | 118.9  |
| C2-C3-C4  | 120.1 | 120.7 | 120.7    | 120.9  | 120.7  |
| C3-C4-O3  | 123.4 | 123.8 | 123.7    | 124.2  | 124.2  |
| C3-C4-C10 | 117.2 | 116.8 | 116.8    | 116.5  | 116.3  |
| O3-C4-C10 | 119.4 | 119.4 | 119.5    | 119.4  | 119.4  |

|                |       |       |       |       |       |
|----------------|-------|-------|-------|-------|-------|
| C4-C10-C5      | 122.4 | 121.2 | 121.3 | 121.0 | 121.0 |
| C4-C10-C9      | 119.5 | 119.6 | 119.7 | 119.7 | 119.7 |
| C10-C5-C6      | 120.4 | 120.4 | 120.5 | 120.3 | 120.3 |
| C5-C6-C7       | 119.8 | 119.6 | 119.7 | 119.6 | 119.6 |
| C6-C7-C8       | 121.1 | 120.8 | 120.7 | 120.8 | 120.8 |
| C7-C8-C9       | 118.1 | 119.0 | 119.0 | 118.9 | 119.0 |
| C8-C9-C10      | 122.6 | 121.0 | 121.1 | 121.1 | 121.0 |
| C8-C9-O1       | 115.9 | 116.8 | 116.9 | 116.8 | 116.8 |
| C3-C1'-C2'     | 122.3 | 122.9 | 122.7 | 122.6 | 122.6 |
| C3-C1'-N1      | 119.6 | 118.6 | 119.0 | 119.4 | 119.4 |
| C2'-C1'-N1     | 118.1 | 118.5 | 118.3 | 118.0 | 117.9 |
| C1'-N1-C1''    | 126.8 | 127.5 | 127.4 | 127.1 | 127.3 |
| N1-C1''-C2''   | 111.9 | 109.4 | 109.6 | 108.8 | 108.9 |
| C1''-C2''-C3'' | 110.8 | 110.4 | 111.0 | 110.4 | 110.6 |
| C2''-C3''-C4'' | 122.8 | 120.4 | 120.7 | 120.3 | 120.3 |
| C2''-C3''-C8'' | 118.9 | 120.8 | 120.7 | 120.8 | 120.9 |
| C3''-C4''-C5'' | 121.6 | 120.8 | 120.8 | 120.6 | 120.7 |
| C4''-C5''-C6'' | 119.2 | 119.9 | 119.9 | 119.8 | 119.8 |
| C5''-C6''-O5   | 123.0 | 123.1 | 122.7 | 122.4 | 122.6 |
| C5''-C6''-C7'' | 119.4 | 119.8 | 119.9 | 120.2 | 120.1 |
| O5-C6''-C7''   | 117.6 | 117.1 | 117.4 | 117.4 | 117.3 |
| C6''-C7''-C8'' | 120.3 | 119.7 | 119.5 | 119.5 | 119.5 |
| C7''-C8''-C3'' | 121.1 | 121.1 | 121.2 | 121.0 | 121.1 |

Table S10. Values of R and MAE for the optimized structures at various level of theory.

|              |                | APFD  | B3LYP-D3 | M05-2X | M06-2X |
|--------------|----------------|-------|----------|--------|--------|
| Bond lengths | <b>R</b>       | 0.967 | 0.970    | 0.970  | 0.970  |
|              | <b>MAE [Å]</b> | 0.012 | 0.013    | 0.011  | 0.013  |
| Bond angles  | <b>R</b>       | 0.960 | 0.964    | 0.954  | 0.954  |
|              | <b>MAE [°]</b> | 0.77  | 0.72     | 0.82   | 0.81   |

Table S11. Reactivity parameters of the compounds **L1-L5**.

| Compound  | HOMO energy [eV] | HOMO-LUMO gap [eV] | Dipole moment [D] |
|-----------|------------------|--------------------|-------------------|
| <b>L1</b> | -6.41            | 4.41               | 3.16              |
| <b>L2</b> | -6.44            | 4.53               | 5.70              |
| <b>L3</b> | -6.44            | 4.49               | 4.76              |
| <b>L4</b> | -6.03            | 4.06               | 5.60              |
| <b>L5</b> | -6.16            | 4.15               | 5.35              |

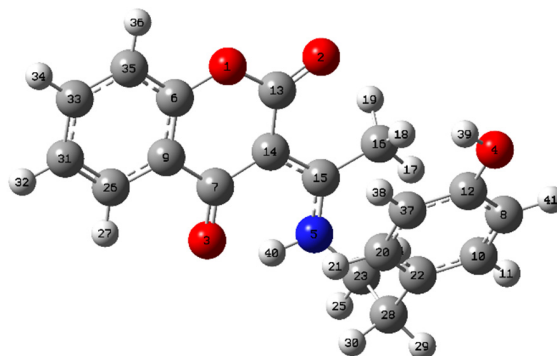

Figure S16. The atom numbering scheme for **L1**.

Table S12. CFFs for the specific atoms of **L1**.

| Atom   | f <sup>-</sup> | f <sup>+</sup> | f <sub>0</sub> |
|--------|----------------|----------------|----------------|
| 1(O )  | 0.022          | 0.020          | 0.021          |
| 2(O )  | <b>0.077</b>   | 0.042          | <b>0.060</b>   |
| 3(O )  | 0.033          | <b>0.074</b>   | <b>0.054</b>   |
| 4(O )  | <b>0.057</b>   | 0.014          | 0.036          |
| 5(N )  | 0.032          | 0.051          | 0.041          |
| 6(C )  | 0.022          | 0.028          | 0.025          |
| 7(C )  | 0.013          | <b>0.069</b>   | 0.041          |
| 8(C )  | 0.039          | 0.016          | 0.027          |
| 9(C )  | 0.016          | 0.023          | 0.020          |
| 10(C ) | 0.025          | 0.009          | 0.017          |
| 11(H ) | 0.021          | 0.014          | 0.017          |
| 12(C ) | 0.039          | 0.010          | 0.024          |
| 13(C ) | 0.024          | 0.018          | 0.021          |
| 14(C ) | <b>0.062</b>   | 0.016          | 0.039          |
| 15(C ) | 0.010          | <b>0.078</b>   | 0.044          |
| 16(C ) | 0.007          | 0.020          | 0.013          |
| 17(H ) | 0.011          | 0.019          | 0.015          |
| 18(H ) | 0.002          | 0.021          | 0.012          |
| 19(H ) | 0.014          | 0.024          | 0.019          |
| 20(C ) | 0.020          | -0.008         | 0.006          |
| 21(H ) | 0.012          | -0.005         | 0.004          |
| 22(C ) | 0.040          | -0.005         | 0.018          |
| 23(C ) | 0.017          | 0.014          | 0.015          |
| 24(H ) | 0.013          | 0.018          | 0.016          |
| 25(H ) | 0.023          | 0.023          | 0.023          |
| 26(C ) | 0.017          | 0.044          | 0.031          |
| 27(H ) | 0.015          | 0.027          | 0.021          |
| 28(C ) | 0.016          | 0.011          | 0.013          |
| 29(H ) | 0.023          | 0.029          | 0.026          |

|        |       |       |              |
|--------|-------|-------|--------------|
| 30(H ) | 0.015 | 0.009 | 0.012        |
| 31(C ) | 0.042 | 0.035 | 0.038        |
| 32(H ) | 0.023 | 0.027 | 0.025        |
| 33(C ) | 0.039 | 0.067 | <b>0.053</b> |
| 34(H ) | 0.023 | 0.038 | 0.030        |
| 35(C ) | 0.021 | 0.038 | 0.029        |
| 36(H ) | 0.017 | 0.027 | 0.022        |
| 37(C ) | 0.024 | 0.002 | 0.013        |
| 38(H ) | 0.016 | 0.004 | 0.010        |
| 39(H ) | 0.022 | 0.007 | 0.015        |
| 40(H ) | 0.011 | 0.016 | 0.014        |
| 41(H ) | 0.025 | 0.015 | 0.020        |

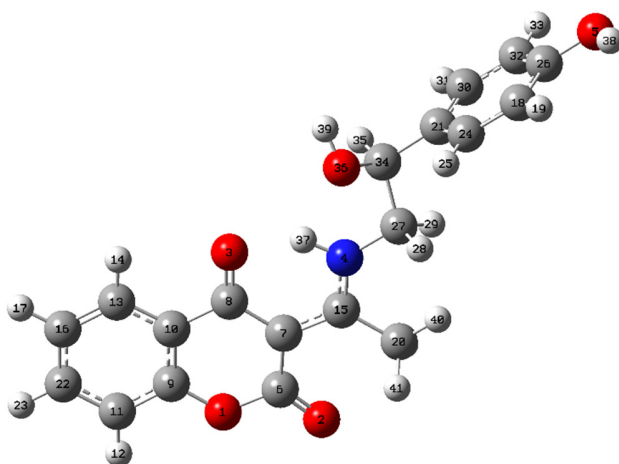

Figure S17. The atom numbering scheme for **L2**.

Table S13. CFFs for the specific atoms of **L2**.

| Atom   | f <sup>-</sup> | f <sup>+</sup> | f <sub>0</sub> |
|--------|----------------|----------------|----------------|
| 1(O )  | 0.027          | 0.017          | 0.022          |
| 2(O )  | <b>0.088</b>   | 0.036          | <b>0.062</b>   |
| 3(O )  | 0.030          | <b>0.059</b>   | 0.044          |
| 4(N )  | 0.041          | 0.039          | 0.040          |
| 5(O )  | <b>0.051</b>   | 0.021          | 0.036          |
| 6(C )  | 0.027          | 0.016          | 0.022          |
| 7(C )  | <b>0.064</b>   | 0.014          | 0.039          |
| 8(C )  | 0.013          | 0.055          | 0.034          |
| 9(C )  | 0.029          | 0.023          | 0.026          |
| 10(C ) | 0.021          | 0.019          | 0.020          |
| 11(C ) | 0.024          | 0.031          | 0.028          |
| 12(H ) | 0.019          | 0.022          | 0.021          |

|        |       |              |              |
|--------|-------|--------------|--------------|
| 13(C ) | 0.018 | 0.035        | 0.027        |
| 14(H ) | 0.015 | 0.021        | 0.018        |
| 15(C ) | 0.017 | <b>0.063</b> | 0.040        |
| 16(C ) | 0.048 | 0.029        | 0.038        |
| 17(H ) | 0.025 | 0.023        | 0.024        |
| 18(C ) | 0.031 | 0.016        | 0.024        |
| 19(H ) | 0.019 | 0.045        | 0.032        |
| 20(C ) | 0.009 | 0.017        | 0.013        |
| 21(C ) | 0.030 | 0.000        | 0.015        |
| 22(C ) | 0.040 | 0.055        | <b>0.048</b> |
| 23(H ) | 0.024 | 0.031        | 0.028        |
| 24(C ) | 0.018 | 0.009        | 0.014        |
| 25(H ) | 0.013 | 0.007        | 0.010        |
| 26(C ) | 0.037 | 0.013        | 0.025        |
| 27(C ) | 0.011 | 0.009        | 0.010        |
| 28(H ) | 0.017 | 0.016        | 0.016        |
| 29(H ) | 0.012 | 0.013        | 0.013        |
| 30(C ) | 0.018 | 0.009        | 0.014        |
| 31(H ) | 0.013 | 0.007        | 0.010        |
| 32(C ) | 0.031 | 0.017        | 0.024        |
| 33(H ) | 0.019 | 0.014        | 0.017        |
| 34(C ) | 0.005 | 0.002        | 0.003        |
| 35(H ) | 0.009 | 0.004        | 0.007        |
| 36(O ) | 0.007 | 0.000        | 0.004        |
| 37(H ) | 0.011 | 0.012        | 0.012        |
| 38(H ) | 0.021 | <b>0.101</b> | <b>0.061</b> |
| 39(H ) | 0.012 | 0.010        | 0.011        |
| 40(H ) | 0.012 | 0.015        | 0.013        |
| 41(H ) | 0.011 | 0.021        | 0.016        |
| 42(H ) | 0.012 | 0.023        | 0.017        |

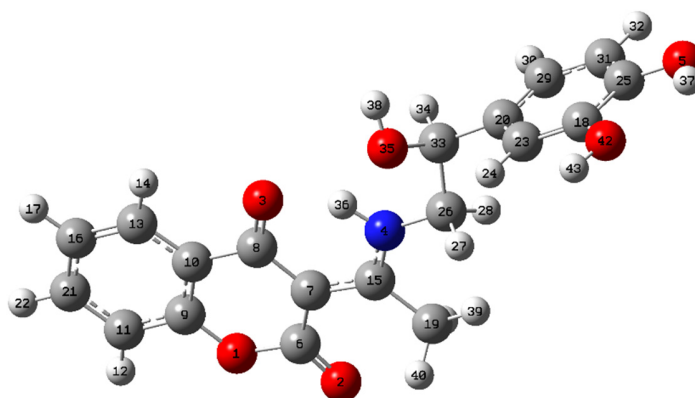

Figure S18. The atom numbering scheme for **L3**.

Table S14. CFFs for the specific atoms of **L3**.

| Atom   | f-           | f+           | f0           |
|--------|--------------|--------------|--------------|
| 1(O )  | 0.024        | 0.017        | 0.020        |
| 2(O )  | <b>0.077</b> | 0.035        | <b>0.056</b> |
| 3(O )  | 0.025        | <b>0.057</b> | 0.041        |
| 4(N )  | 0.033        | 0.037        | 0.035        |
| 5(O )  | <b>0.056</b> | 0.016        | 0.036        |
| 6(C )  | 0.024        | 0.015        | 0.020        |
| 7(C )  | <b>0.055</b> | 0.013        | 0.034        |
| 8(C )  | 0.012        | 0.053        | 0.033        |
| 9(C )  | 0.026        | 0.022        | 0.024        |
| 10(C ) | 0.019        | 0.018        | 0.018        |
| 11(C ) | 0.022        | 0.031        | 0.026        |
| 12(H ) | 0.017        | 0.022        | 0.020        |
| 13(C ) | 0.016        | 0.035        | 0.025        |
| 14(H ) | 0.013        | 0.021        | 0.017        |
| 15(C ) | 0.015        | <b>0.061</b> | 0.038        |
| 16(C ) | 0.044        | 0.028        | 0.036        |
| 17(H ) | 0.023        | 0.022        | 0.022        |
| 18(C ) | 0.038        | 0.010        | 0.024        |
| 19(C ) | 0.008        | 0.017        | 0.012        |
| 20(C ) | 0.032        | -0.002       | 0.015        |
| 21(C ) | 0.036        | 0.054        | <b>0.045</b> |
| 22(H ) | 0.022        | 0.031        | 0.026        |
| 23(C ) | 0.015        | 0.006        | 0.011        |
| 24(H ) | 0.014        | 0.023        | 0.018        |
| 25(C ) | 0.042        | 0.013        | 0.028        |
| 26(C ) | 0.010        | 0.009        | 0.009        |
| 27(H ) | 0.015        | 0.022        | 0.018        |
| 28(H ) | 0.011        | 0.012        | 0.011        |
| 29(C ) | 0.034        | 0.008        | 0.021        |
| 30(H ) | 0.019        | 0.006        | 0.012        |
| 31(C ) | 0.027        | 0.015        | 0.021        |
| 32(H ) | 0.021        | 0.012        | 0.017        |
| 33(C ) | 0.005        | 0.002        | 0.004        |
| 34(H ) | 0.010        | 0.005        | 0.007        |
| 35(O ) | 0.009        | -0.001       | 0.004        |
| 36(H ) | 0.009        | 0.012        | 0.011        |
| 37(H ) | 0.022        | 0.025        | 0.023        |
| 38(H ) | 0.011        | 0.011        | 0.011        |
| 39(H ) | 0.010        | 0.015        | 0.012        |
| 40(H ) | 0.011        | 0.019        | 0.015        |
| 41(H ) | 0.011        | 0.023        | 0.017        |
| 42(O ) | 0.039        | 0.022        | 0.031        |
| 43(H ) | 0.020        | <b>0.119</b> | <b>0.069</b> |



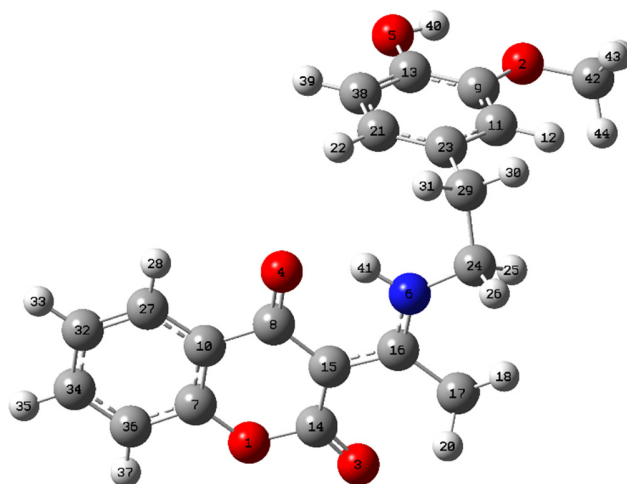

Figure S19. The atom numbering scheme for **L4**.

Table S15. CFFs for the specific atoms of **L4**.

| Atom   | f <sup>-</sup> | f <sup>+</sup> | f <sup>0</sup> |
|--------|----------------|----------------|----------------|
| 1(O )  | 0.020          | 0.019          | 0.019          |
| 2(O )  | 0.041          | 0.008          | 0.024          |
| 3(O )  | <b>0.063</b>   | 0.040          | <b>0.052</b>   |
| 4(O )  | 0.014          | <b>0.066</b>   | 0.040          |
| 5(O )  | <b>0.066</b>   | 0.013          | 0.039          |
| 6(N )  | 0.020          | 0.046          | 0.033          |
| 7(C )  | 0.019          | 0.026          | 0.022          |
| 8(C )  | 0.009          | <b>0.063</b>   | 0.036          |
| 9(C )  | 0.045          | 0.009          | 0.027          |
| 10(C ) | 0.011          | 0.021          | 0.016          |
| 11(C ) | 0.021          | 0.005          | 0.013          |
| 12(H ) | 0.019          | 0.009          | 0.014          |
| 13(C ) | <b>0.051</b>   | 0.011          | 0.031          |
| 14(C ) | 0.020          | 0.017          | 0.019          |
| 15(C ) | 0.044          | 0.015          | 0.029          |
| 16(C ) | 0.011          | <b>0.072</b>   | <b>0.042</b>   |
| 17(C ) | 0.007          | 0.020          | 0.013          |
| 18(H ) | 0.010          | 0.019          | 0.014          |
| 19(H ) | 0.008          | 0.028          | 0.018          |
| 20(H ) | 0.012          | 0.022          | 0.017          |
| 21(C ) | 0.043          | -0.006         | 0.019          |

|        |       |        |              |
|--------|-------|--------|--------------|
| 22(H ) | 0.020 | -0.003 | 0.009        |
| 23(C ) | 0.049 | -0.005 | 0.022        |
| 24(C ) | 0.011 | 0.013  | 0.012        |
| 25(H ) | 0.009 | 0.014  | 0.012        |
| 26(H ) | 0.018 | 0.036  | 0.027        |
| 27(C ) | 0.011 | 0.040  | 0.025        |
| 28(H ) | 0.009 | 0.024  | 0.016        |
| 29(C ) | 0.010 | 0.007  | 0.009        |
| 30(H ) | 0.019 | 0.031  | 0.025        |
| 31(H ) | 0.014 | 0.008  | 0.011        |
| 32(C ) | 0.034 | 0.032  | 0.033        |
| 33(H ) | 0.019 | 0.025  | 0.022        |
| 34(C ) | 0.030 | 0.062  | <b>0.046</b> |
| 35(H ) | 0.019 | 0.035  | 0.027        |
| 36(C ) | 0.019 | 0.035  | 0.027        |
| 37(H ) | 0.015 | 0.025  | 0.020        |
| 38(C ) | 0.029 | 0.004  | 0.016        |
| 39(H ) | 0.023 | 0.005  | 0.014        |
| 40(H ) | 0.026 | 0.009  | 0.017        |
| 41(H ) | 0.004 | 0.014  | 0.009        |
| 42(C ) | 0.015 | 0.011  | 0.013        |
| 43(H ) | 0.016 | 0.022  | 0.019        |
| 44(H ) | 0.014 | 0.008  | 0.011        |
| 45(H ) | 0.019 | 0.022  | 0.021        |

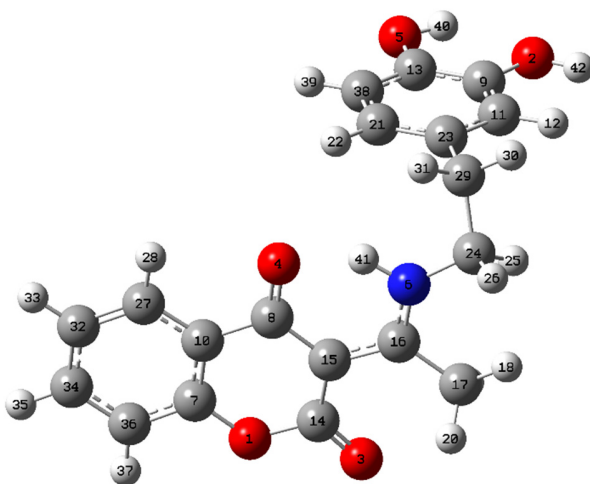

Figure S20. The atom numbering scheme for **L5**.

Table S16. CFFs for the specific atoms of L5.

| Atom   | f-           | f+           | f0           |
|--------|--------------|--------------|--------------|
| 1(O )  | 0.022        | 0.018        | 0.020        |
| 2(O )  | 0.047        | 0.018        | 0.032        |
| 3(O )  | <b>0.069</b> | 0.037        | <b>0.053</b> |
| 4(O )  | 0.017        | <b>0.060</b> | 0.038        |
| 5(O )  | <b>0.064</b> | 0.014        | 0.039        |
| 6(N )  | 0.024        | 0.041        | 0.033        |
| 7(C )  | 0.022        | 0.024        | 0.023        |
| 8(C )  | 0.009        | 0.058        | 0.034        |
| 9(C )  | 0.048        | 0.010        | 0.029        |
| 10(C ) | 0.013        | 0.019        | 0.016        |
| 11(C ) | 0.022        | 0.008        | 0.015        |
| 12(H ) | 0.021        | 0.029        | 0.025        |
| 13(C ) | <b>0.049</b> | 0.011        | 0.030        |
| 14(C ) | 0.022        | 0.016        | 0.019        |
| 15(C ) | 0.047        | 0.014        | 0.030        |
| 16(C ) | 0.012        | <b>0.066</b> | 0.039        |
| 17(C ) | 0.007        | 0.018        | 0.013        |
| 18(H ) | 0.011        | 0.017        | 0.014        |
| 19(H ) | 0.009        | 0.026        | 0.017        |
| 20(H ) | 0.012        | 0.021        | 0.016        |
| 21(C ) | 0.039        | -0.004       | 0.018        |
| 22(H ) | 0.018        | -0.002       | 0.008        |
| 23(C ) | 0.045        | -0.004       | 0.021        |
| 24(C ) | 0.011        | 0.011        | 0.011        |
| 25(H ) | 0.010        | 0.012        | 0.011        |
| 26(H ) | 0.019        | 0.031        | 0.025        |
| 27(C ) | 0.013        | 0.037        | 0.025        |
| 28(H ) | 0.010        | 0.022        | 0.016        |
| 29(C ) | 0.010        | 0.007        | 0.008        |
| 30(H ) | 0.018        | 0.026        | 0.022        |
| 31(H ) | 0.014        | 0.008        | 0.011        |
| 32(C ) | 0.038        | 0.030        | 0.034        |
| 33(H ) | 0.020        | 0.024        | 0.022        |
| 34(C ) | 0.033        | 0.058        | <b>0.045</b> |
| 35(H ) | 0.020        | 0.033        | 0.027        |
| 36(C ) | 0.021        | 0.033        | 0.027        |
| 37(H ) | 0.016        | 0.023        | 0.020        |
| 38(C ) | 0.026        | 0.006        | 0.016        |
| 39(H ) | 0.021        | 0.007        | 0.014        |
| 40(H ) | 0.026        | 0.014        | 0.020        |
| 41(H ) | 0.005        | 0.012        | 0.009        |
| 42(H ) | 0.025        | <b>0.080</b> | <b>0.052</b> |

# HCT-116

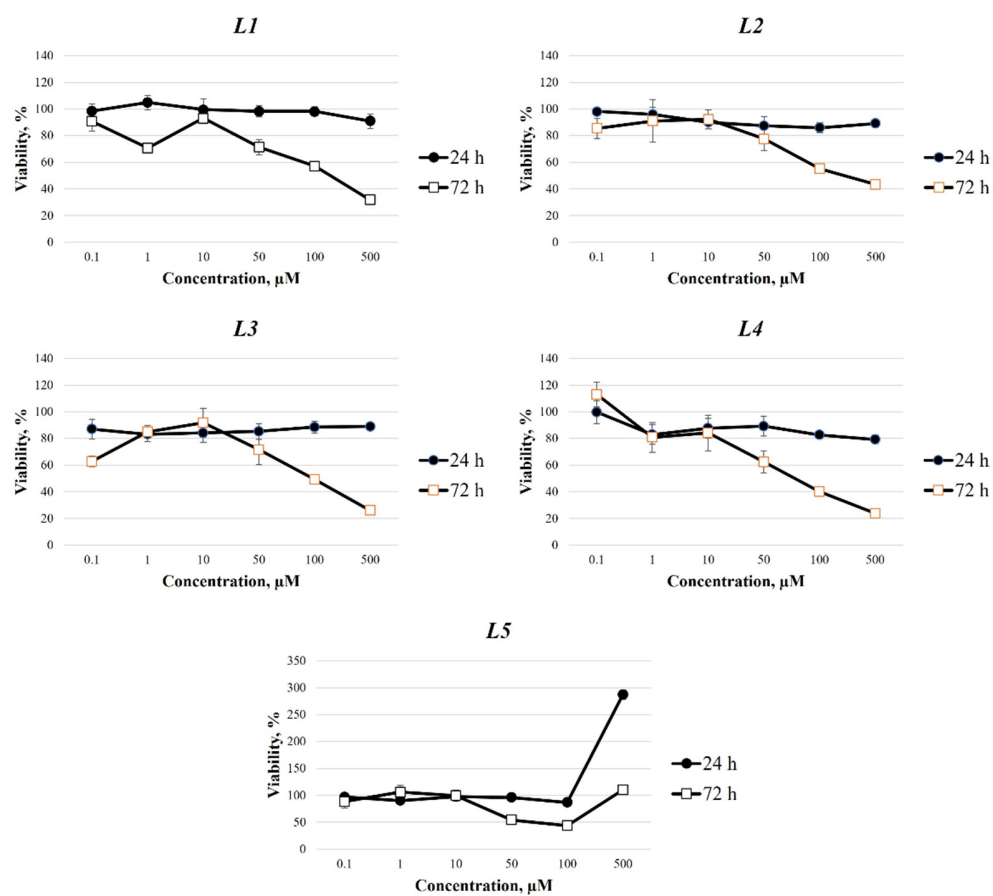

Figure S21. The dose response curves of the effect of **L1**, **L2**, **L3**, **L4**, and **L5** on HCT-116 cell line growth after 24 and 72 h of exposure.

## HeLa

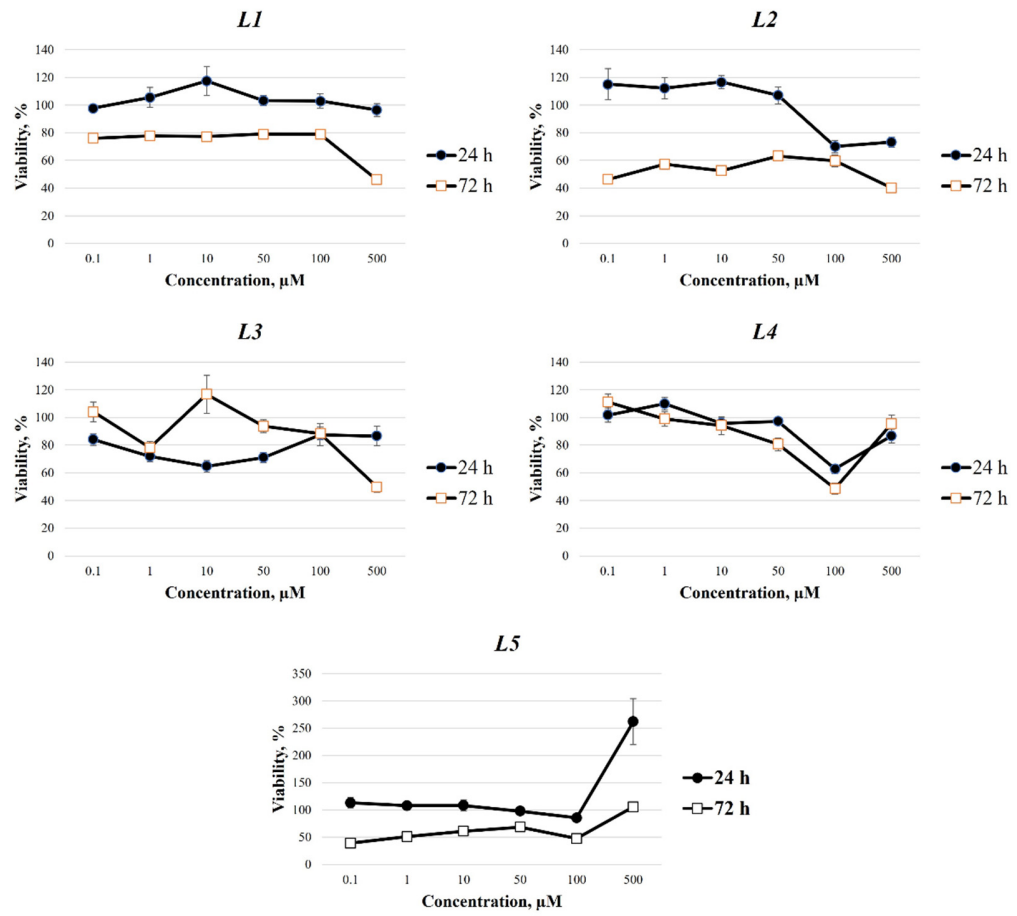

Figure S22. The dose response curves of the effect of **L1**, **L2**, **L3**, **L4**, and **L5** on HeLa cell line growth after 24 and 72 h of exposure.

## MDA-MB-231

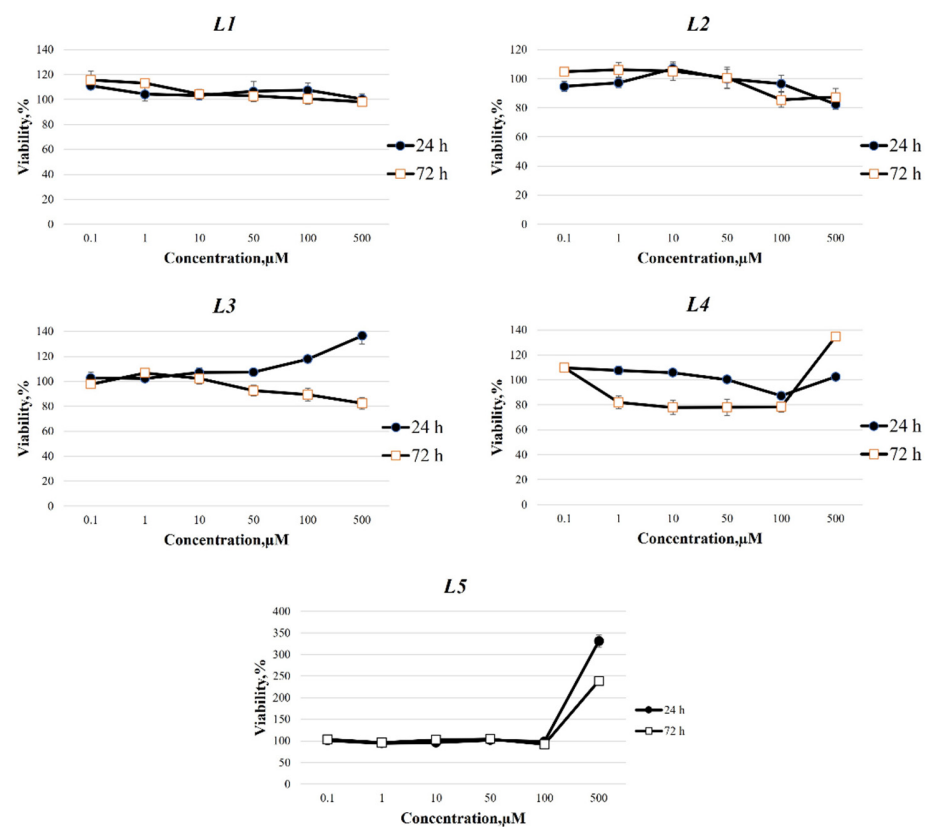

Figure S23. The dose response curves of the effect of **L1**, **L2**, **L3**, **L4**, and **L5** on MDA-MB-231 cell line growth after 24 and 72 h of exposure.

## MRC-5

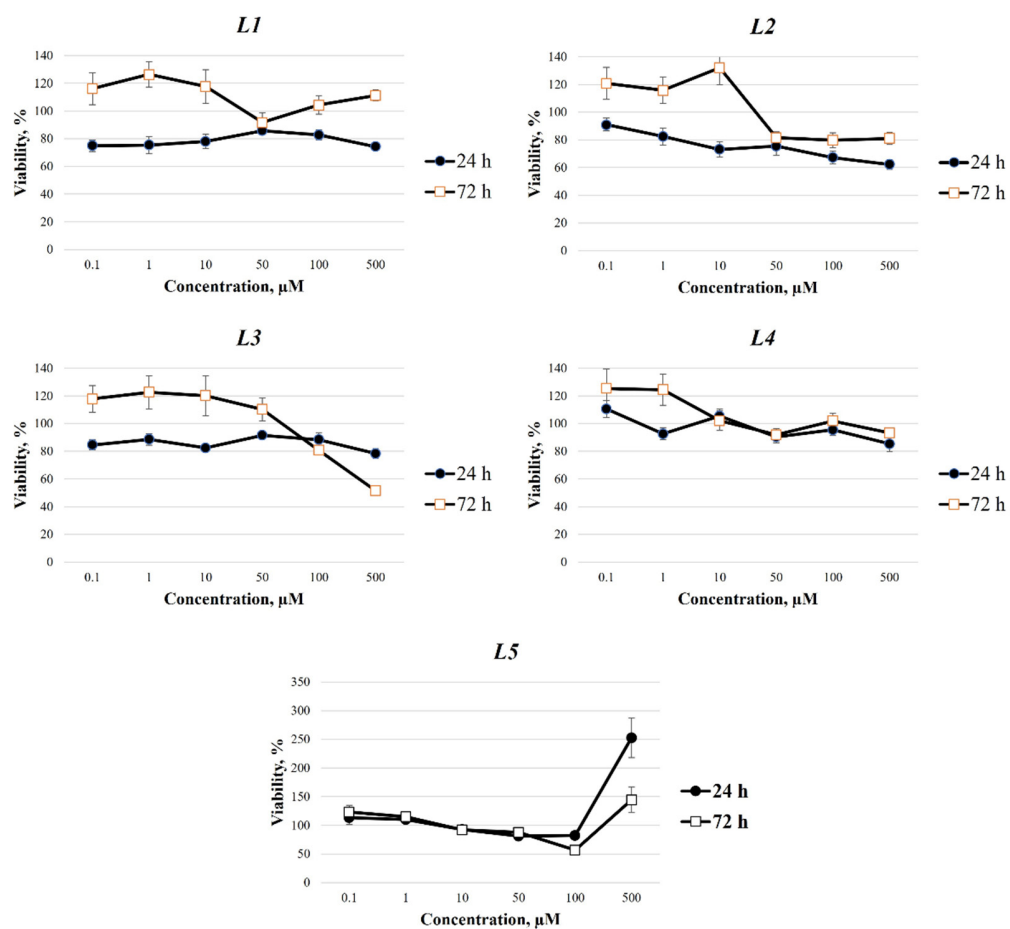

Figure S24. The dose response curves of the effect of **L1**, **L2**, **L3**, **L4**, and **L5** on MRC-5 cell line growth after 24 and 72 h of exposure.

Table S17. Selectivity index of tested substances after 24 and 72 h exposure.

| SI        | HCT-116/MRC-5 |      | HeLa/MRC-5 |      |
|-----------|---------------|------|------------|------|
|           | 24 h          | 72 h | 24 h       | 72 h |
| <b>L1</b> | 1             | 2.9  | 1          | 1.1  |
| <b>L2</b> | 1             | 2.0  | 1          | 2.4  |
| <b>L3</b> | 1             | 4.7  | 1          | 1    |
| <b>L4</b> | 1             | 6.8  | 1          | 3.3  |
| <b>L5</b> | 1             | 6.8  | 1          | 5.4  |

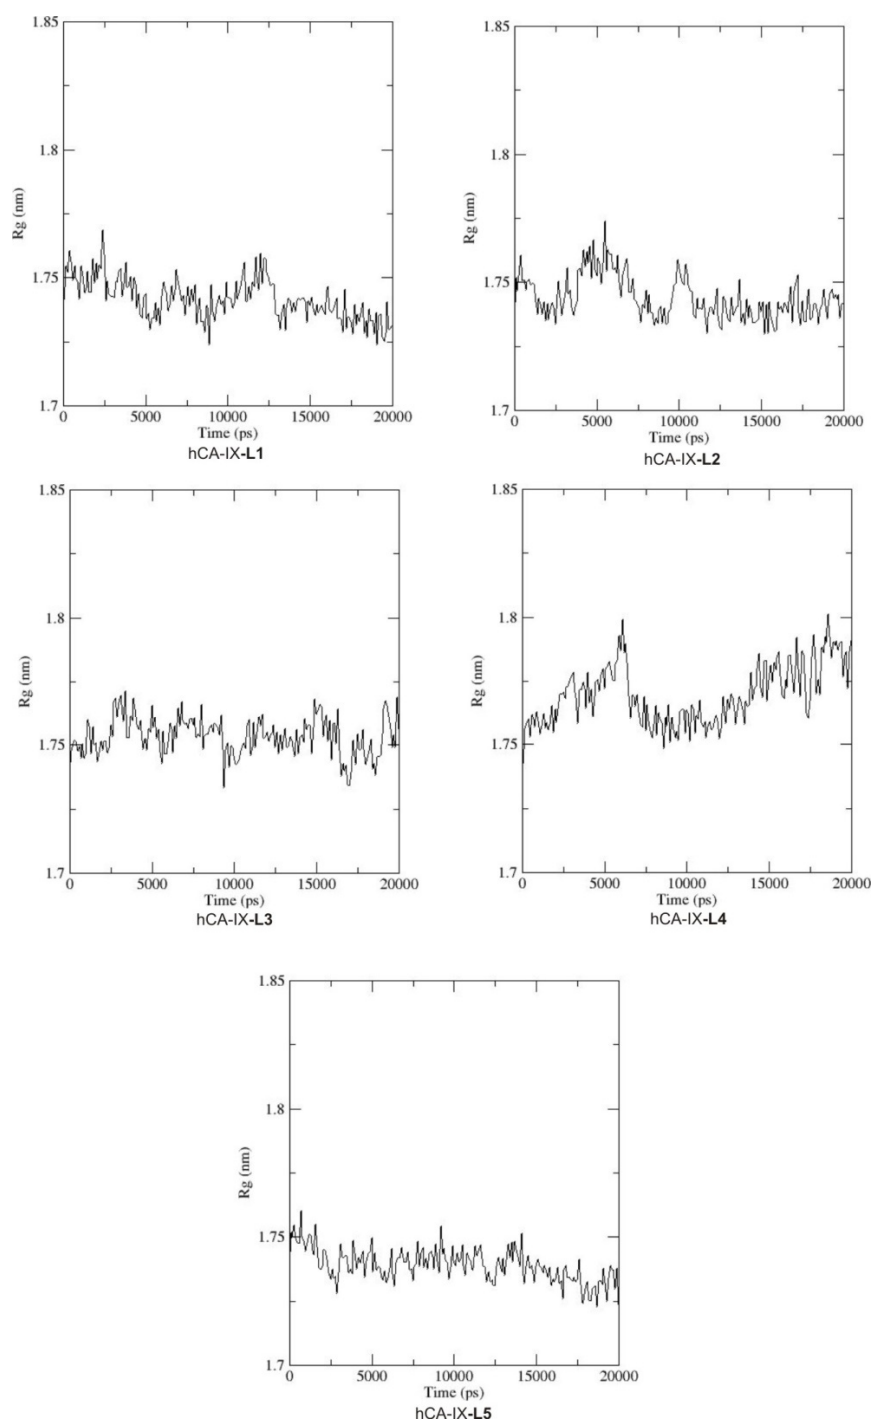

Figure S25. The plot of the radius of gyration ( $R_g$ ) during 20 ns MD simulation of hCA-IX in complex with all candidate compounds.



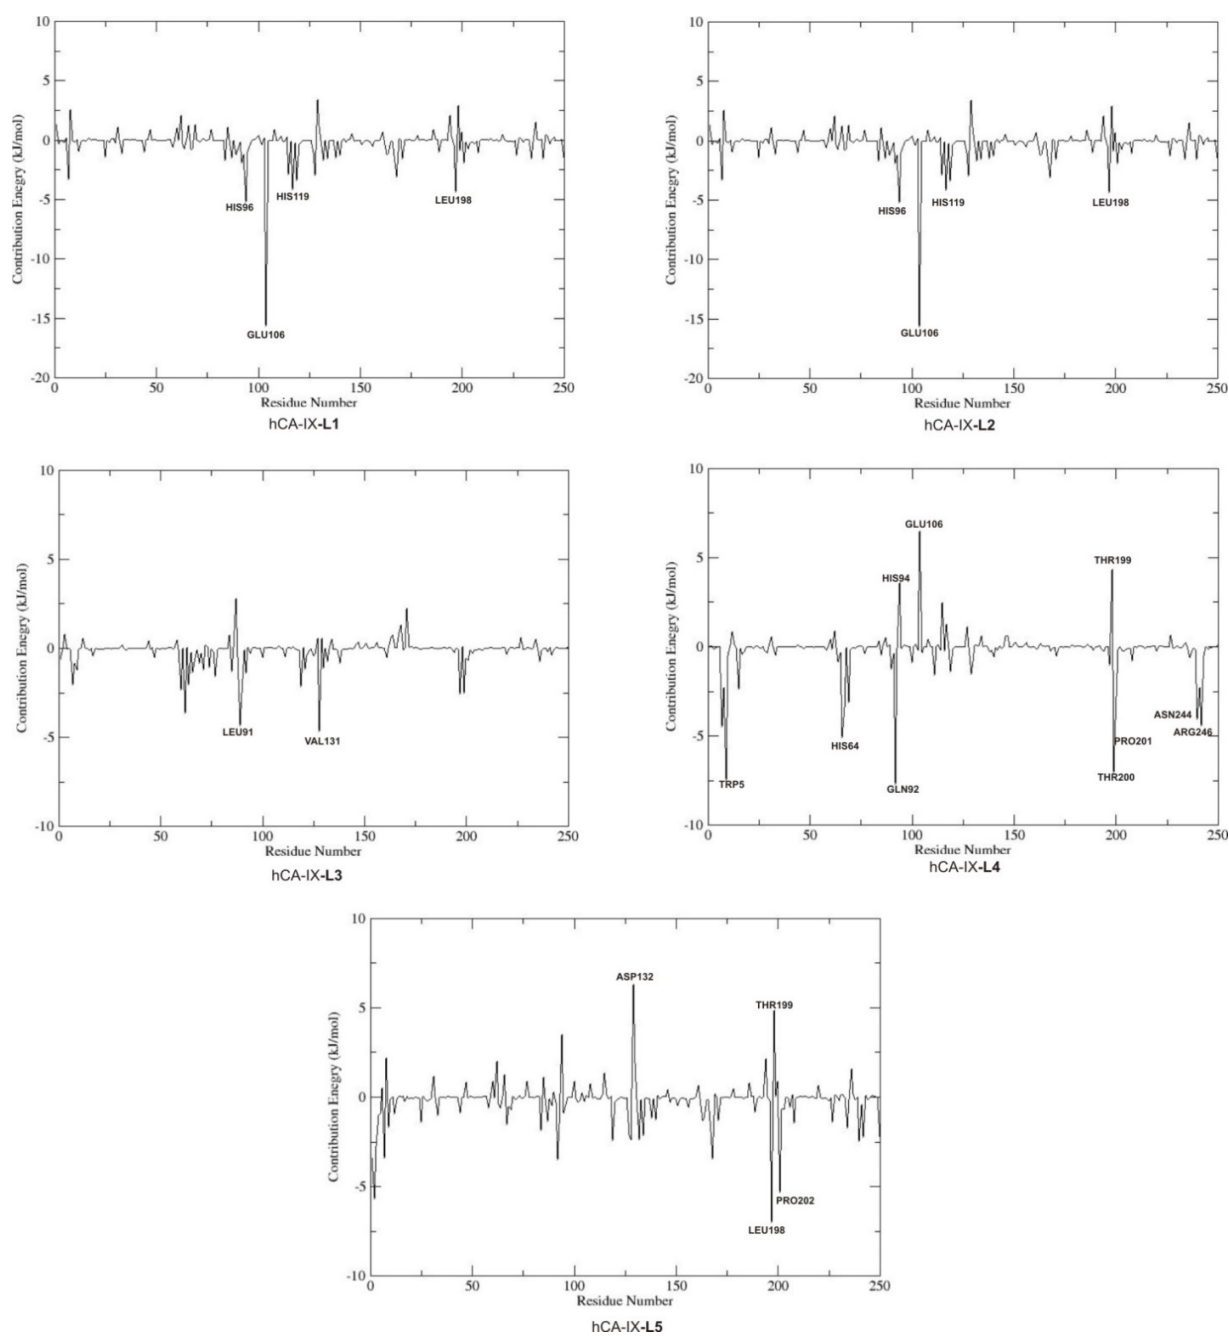

Figure S26. Comparison of the contribution of hCA-IX residues to the binding free energy in complexes with investigated ligands.

Table S18. The Lipinski rules applied to coumarin-neurotransmitter derivatives.

| Compound  | Molecular weight (<500 DA) | Log P (logP ≤ 5) | H bond donors (≤ 5) | H bond acceptors (≤ 10) | Number of violations |
|-----------|----------------------------|------------------|---------------------|-------------------------|----------------------|
| <b>L1</b> | 323.3                      | 1.90             | 2                   | 4                       | 0                    |
| <b>L2</b> | 339.3                      | 1.80             | 3                   | 5                       | 0                    |
| <b>L3</b> | 355.3                      | 0.86             | 4                   | 6                       | 0                    |
| <b>L4</b> | 353.4                      | 1.84             | 2                   | 5                       | 0                    |
| <b>L5</b> | 339.3                      | 1.56             | 3                   | 5                       | 0                    |
